# Supplementary material for: LILRB2-mediated TREM2 signaling inhibition suppresses microglia functions
Source: PubMed Central journal article supplement (PMC9206387; doi:10.1186/s13024-022-00550-y), 2022-06-18

## Supplementary Figure 6

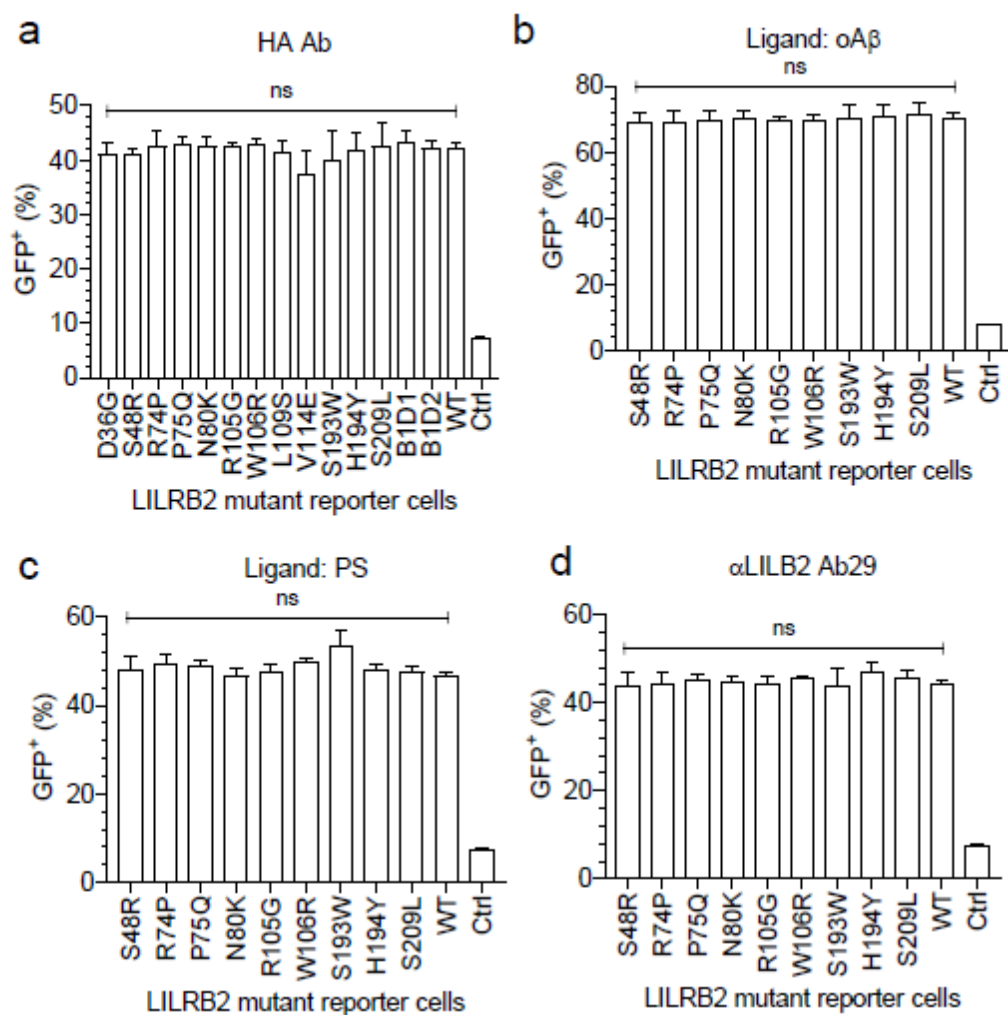

Supplement: 13024_2022_550_MOESM6_ESM.pdf [file 13024_2022_550_MOESM6_ESM.pdf]
